# Supplementary material for: Antimicrobial Resistance of Escherichia coli Causing Uncomplicated Urinary Tract Infections: A European Update for 2014 and Comparison with 2000 and 2008
Source: Springer Nature journal article supplement (doi:10.1007/s40121-015-0095-5), 2015-10-27
Supplement: MOESM1 [file 9339768]

## *Why carry out this study?*

- Antimicrobial resistance is of increasing concern.
- The aim of this study was to update resistance in urinary isolates of *Escherichia coli* in Europe and compare with resistance rates in 2000 and 2008.

## *What was learned from the study?*

- Urinary *E. coli* have increasing resistance, particularly to ciprofloxacin and trimethoprim.
- Resistance to mecillinam (amdinocillin) and nitrofurantoin remains low.

This summary slide represents the opinions of the authors. The article processing charges for this publication were funded by Leo Pharma, Denmark. For a full list of acknowledgments and disclosures for all authors of this article, please see the full text online. © The Author(s) 2015. Creative Commons Attribution Noncommercial License (CC BY-NC).
